# Supplementary material for: To what extend can soil moisture and soil contamination stresses affect greenhouse gas emissions? An attempt to calibrate a nitrification/denitrification model
Source: Copernicus journal article supplement (doi:10.5194/bg-2021-265), 2021-11-03
Supplement: Supplementary file [file bg-2021-265-AC2-supplement.pdf]

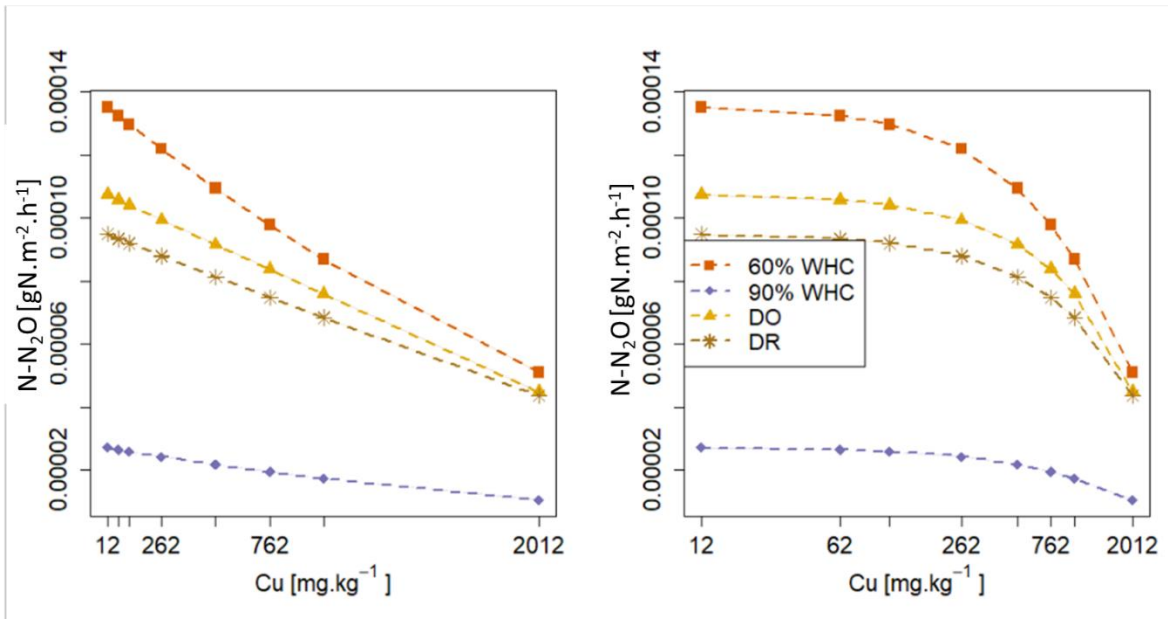

Fig. Rep 1: Modeled soil nitrate concentrations as a function of Cu concentrations without (left) x-axis log representation and with (right panel) x-axis log representation

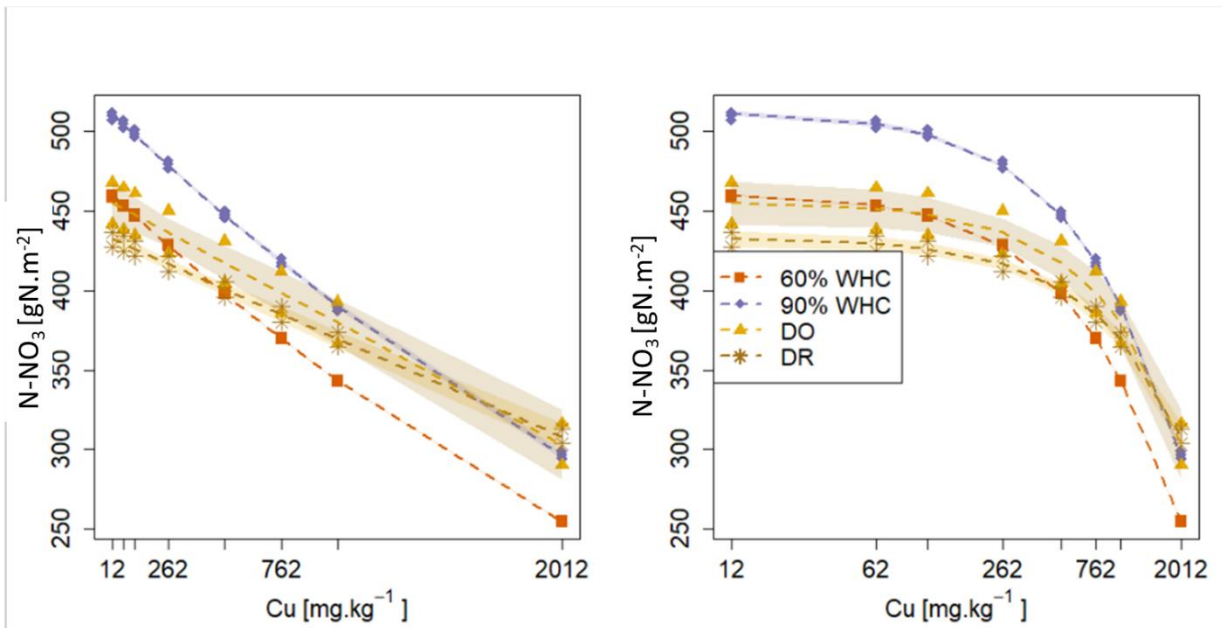

Fig. Rep 2: Modeled soil nitrate concentrations as a function of Cu concentrations without (left) x-axis log representation and with (right panel) x-axis log representation
